# Supplementary material for: The Microtubule-Associated Innate Immune Sensor GEF-H1 Does Not Influence Mouse Norovirus Replication in Murine Macrophages
Source: MDPI journal article supplement (doi:10.3390/v11010047), 2019-01-10
Supplement: s1 [file s1]

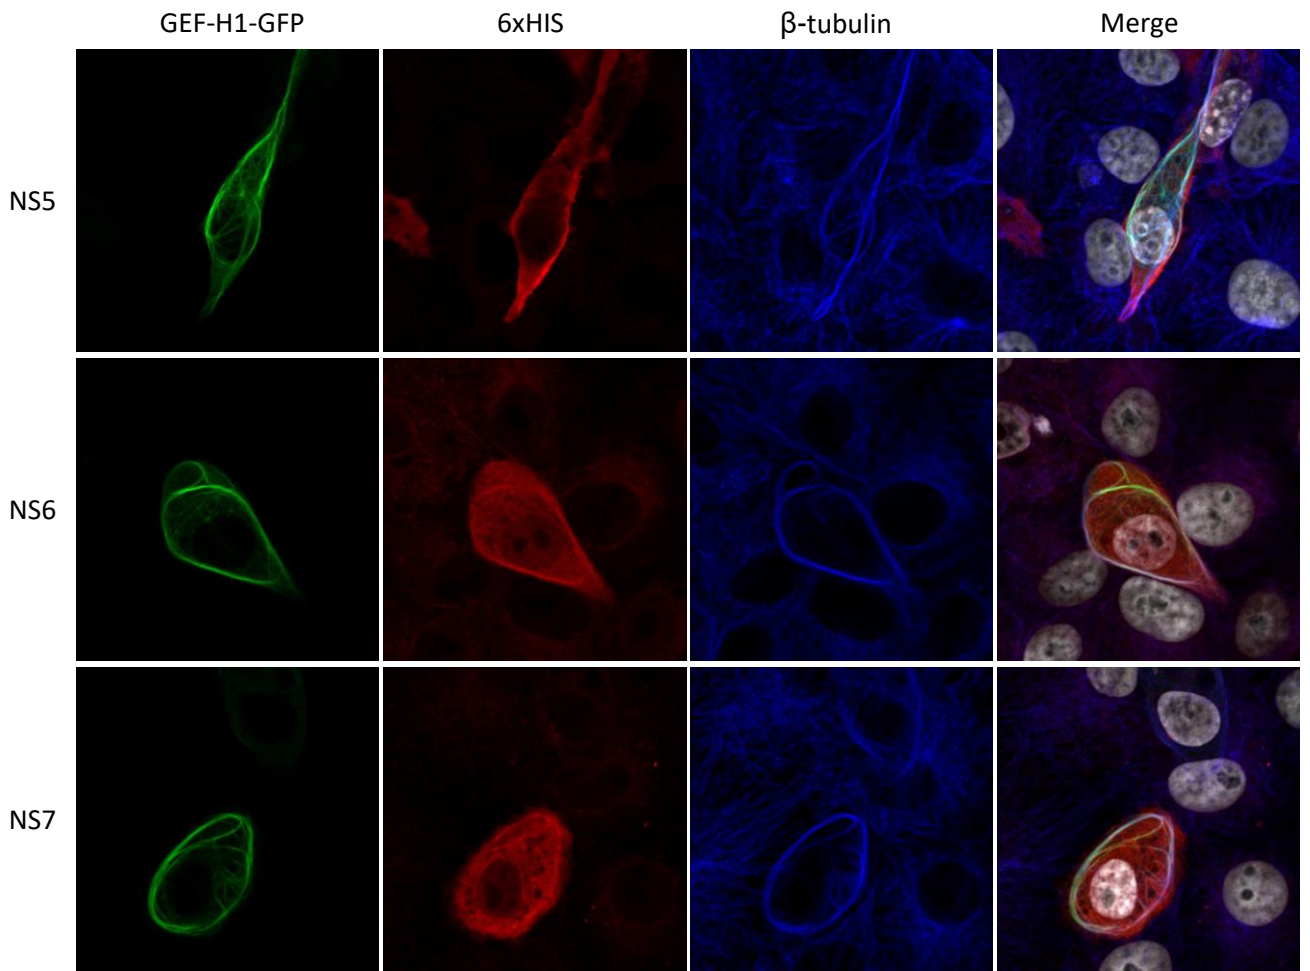

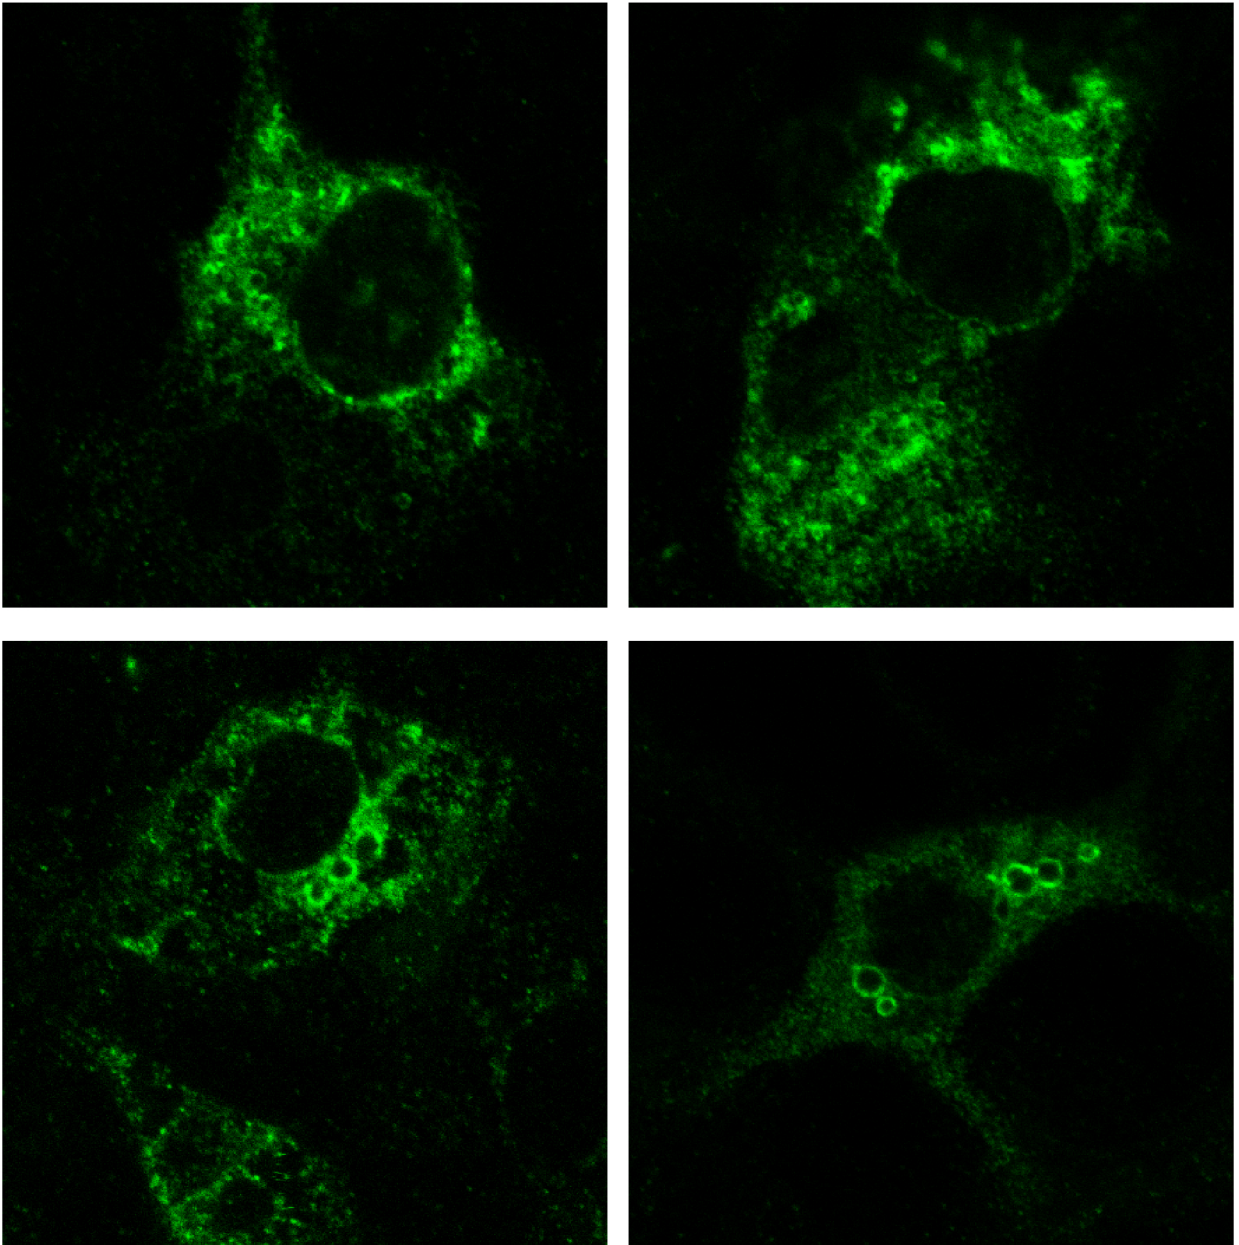

Supplementary Figure 2  
Fritzlar, White and Mackenzie
